# Supplementary material
Source: PubMed Central journal article supplement (PMC8420631)

## Supplementary Appendix for

# COVID-19 associated Mucormycosis Presenting to the Emergency Department – An Observational Study of 70 Patients

### Data Collection Form

| COVID – MUCORMYCOSIS DATA COLLECTION FORM                    |                     |                            |
|--------------------------------------------------------------|---------------------|----------------------------|
| Name & UHID                                                  |                     | WRITE (YES/NO/ANY DETAILS) |
| Age                                                          |                     |                            |
| Gender                                                       |                     |                            |
| Permanent Address                                            |                     |                            |
| Telephone number of attendant                                |                     |                            |
| Whether admitted elsewhere (take pics of previous documents) |                     |                            |
| Date and Time of Arrival                                     |                     |                            |
| Triage                                                       |                     |                            |
| Symptoms (COVID)                                             | Fever and grade     |                            |
|                                                              | Headache            |                            |
|                                                              | Body aches          |                            |
|                                                              | Eye pain            |                            |
|                                                              | Chills              |                            |
|                                                              | Cough with sputum   |                            |
|                                                              | Dry cough           |                            |
|                                                              | Sore throat         |                            |
|                                                              | Rhinorrhea          |                            |
|                                                              | Hemoptysis          |                            |
|                                                              | Shortness of breath |                            |
|                                                              | Nausea              |                            |
|                                                              | Vomiting            |                            |
|                                                              | Diarrhea            |                            |
| Signs and symptoms of mucormycosis (MM)                      | Chills              |                            |
|                                                              | Loss of smell       |                            |
|                                                              | Loss of taste       |                            |
|                                                              | Nasal stuffiness    |                            |

|                                                                  |                                                                                                                                                                                                                                                                        |  |
|------------------------------------------------------------------|------------------------------------------------------------------------------------------------------------------------------------------------------------------------------------------------------------------------------------------------------------------------|--|
|                                                                  | Epistaxis                                                                                                                                                                                                                                                              |  |
|                                                                  | Nasal ulceration                                                                                                                                                                                                                                                       |  |
|                                                                  | Rhinorrhea                                                                                                                                                                                                                                                             |  |
|                                                                  | Face tenderness (where)                                                                                                                                                                                                                                                |  |
|                                                                  | Face ulceration, any lesion                                                                                                                                                                                                                                            |  |
|                                                                  | Blindness                                                                                                                                                                                                                                                              |  |
|                                                                  | Ophthalmoplegia                                                                                                                                                                                                                                                        |  |
|                                                                  | Proptosis                                                                                                                                                                                                                                                              |  |
|                                                                  | Periorbital swelling                                                                                                                                                                                                                                                   |  |
|                                                                  | Cutaneous lesion                                                                                                                                                                                                                                                       |  |
|                                                                  | Focal neurological deficit (details)                                                                                                                                                                                                                                   |  |
|                                                                  | Altered sensorium                                                                                                                                                                                                                                                      |  |
|                                                                  | Any renal symptoms like flank pain, hematuria                                                                                                                                                                                                                          |  |
| Significant Past Medical History and specific risk factors of MM |                                                                                                                                                                                                                                                                        |  |
|                                                                  | Diabetes (controlled or not) (on which drug – OHA/insulin, dosage)                                                                                                                                                                                                     |  |
|                                                                  | Hypertension                                                                                                                                                                                                                                                           |  |
|                                                                  | Coronary artery disease                                                                                                                                                                                                                                                |  |
|                                                                  | Cancer, any hematological malignancy                                                                                                                                                                                                                                   |  |
|                                                                  | <p><b><i>Steroid use for COVID:</i></b></p> <p>How many days of steroid use?</p> <p>Dexamethasone/ Wysolone/<br/>Methylprednisolone / Other</p> <p>Dosage</p> <p><b>At which stage of COVID was the steroid used?</b></p> <p><b>Where was the patient treated?</b></p> |  |
|                                                                  | Transplant patient (hematopoietic cells/solid organ)                                                                                                                                                                                                                   |  |
|                                                                  | AIDS                                                                                                                                                                                                                                                                   |  |
|                                                                  | Injection drug user                                                                                                                                                                                                                                                    |  |

|                                                                                                              |                                                                                                                                     |  |
|--------------------------------------------------------------------------------------------------------------|-------------------------------------------------------------------------------------------------------------------------------------|--|
|                                                                                                              | Trauma                                                                                                                              |  |
|                                                                                                              | Burns                                                                                                                               |  |
|                                                                                                              | Malnutrition                                                                                                                        |  |
|                                                                                                              | Severity of COVID<br>mild/moderate/severe at symptom<br>onset                                                                       |  |
|                                                                                                              | Transplant patient (hematopoietic<br>cells/solid organ)                                                                             |  |
|                                                                                                              | Immunocompromised state (other)                                                                                                     |  |
| Primary survey on ED<br>arrival:                                                                             |                                                                                                                                     |  |
| Physical Exam Findings<br>on Initial Assessment                                                              | Face<br>Eye<br>Ear<br>Nose                                                                                                          |  |
|                                                                                                              | Throat                                                                                                                              |  |
|                                                                                                              | Lymph nodes                                                                                                                         |  |
|                                                                                                              | Rash                                                                                                                                |  |
|                                                                                                              | Chest auscultation                                                                                                                  |  |
|                                                                                                              | Liver                                                                                                                               |  |
|                                                                                                              | Spleen                                                                                                                              |  |
| Vaccination status                                                                                           |                                                                                                                                     |  |
|                                                                                                              | Which vaccine<br><br>Date of 1 <sup>st</sup> dose<br><br>Date of 2 <sup>nd</sup> dose                                               |  |
| How was the diagnosis<br>made? ( clinical and<br>radiological images to be<br>taken) (date of tests<br>done) | CT PNS, face, brain<br><br>MRI<br><br>Tissue diagnosis – KOH mount<br><br>Fungal culture<br><br>CT chest showing pulmonary<br>mucor |  |
| CXR findings                                                                                                 | Date/time                                                                                                                           |  |
| If covid was diagnosed<br>in other hospital, what all                                                        |                                                                                                                                     |  |

|                                                                                                                 |                                                                                                                                                        |                                                     |
|-----------------------------------------------------------------------------------------------------------------|--------------------------------------------------------------------------------------------------------------------------------------------------------|-----------------------------------------------------|
| treatment were given (including oxygen therapy, steroids, any other immunosuppressants, etc – take all details) |                                                                                                                                                        |                                                     |
| Emergency Diagnosis                                                                                             | Mild COVID                                                                                                                                             |                                                     |
|                                                                                                                 | Moderate COVID                                                                                                                                         |                                                     |
|                                                                                                                 | Severe COVID                                                                                                                                           |                                                     |
| Type of mucormycosis                                                                                            | Rhinocerebral                                                                                                                                          |                                                     |
|                                                                                                                 | Pulmonary                                                                                                                                              |                                                     |
|                                                                                                                 | Renal                                                                                                                                                  |                                                     |
|                                                                                                                 | Gastrointestinal                                                                                                                                       |                                                     |
|                                                                                                                 | Cutaneous                                                                                                                                              |                                                     |
|                                                                                                                 | Isolated CNS                                                                                                                                           |                                                     |
|                                                                                                                 | disseminated                                                                                                                                           |                                                     |
| Main Treatment Given in the ED                                                                                  | Oxygen                                                                                                                                                 | Equipment – face mask/NRBM/ bain circuit/ NIV/ HFNC |
|                                                                                                                 | NIV                                                                                                                                                    | Type                                                |
|                                                                                                                 | Intubation                                                                                                                                             | RSI/ Awake/DSI                                      |
|                                                                                                                 | Steroids – Dexa/<br>Methylpred/Wysolone<br>Dosage<br>Clexane & Dosage                                                                                  |                                                     |
|                                                                                                                 | Liposomal Amphotericin B - yes /<br>no<br>Posaconazole - yes/no<br>Isavuconazole<br>Caspofungin - yes /no<br>Any combination done<br>Surgery planned?? |                                                     |
| Laboratory Findings                                                                                             | CBC – Hb/TLC/ Polys/<br>lymphos/platelets                                                                                                              |                                                     |
|                                                                                                                 | CRP                                                                                                                                                    |                                                     |
|                                                                                                                 | Procalcitonin                                                                                                                                          |                                                     |
|                                                                                                                 | D dimer                                                                                                                                                |                                                     |
|                                                                                                                 | Urea/ creatinine                                                                                                                                       |                                                     |
|                                                                                                                 | Ferritin                                                                                                                                               |                                                     |

|                                           |     |  |
|-------------------------------------------|-----|--|
|                                           | ABG |  |
| Date and Time of ED Disposition (details) |     |  |
| Total Duration of Stay in ED              |     |  |
| ANY OTHER RELEVANT DETAILS                |     |  |

## Supplementary Figure – 1

Epidemiological trends of COVID-19 patient surge and Mucormycosis patients surge showing a lag period of 20 days between COVID-19 peak and Mucormycosis peak

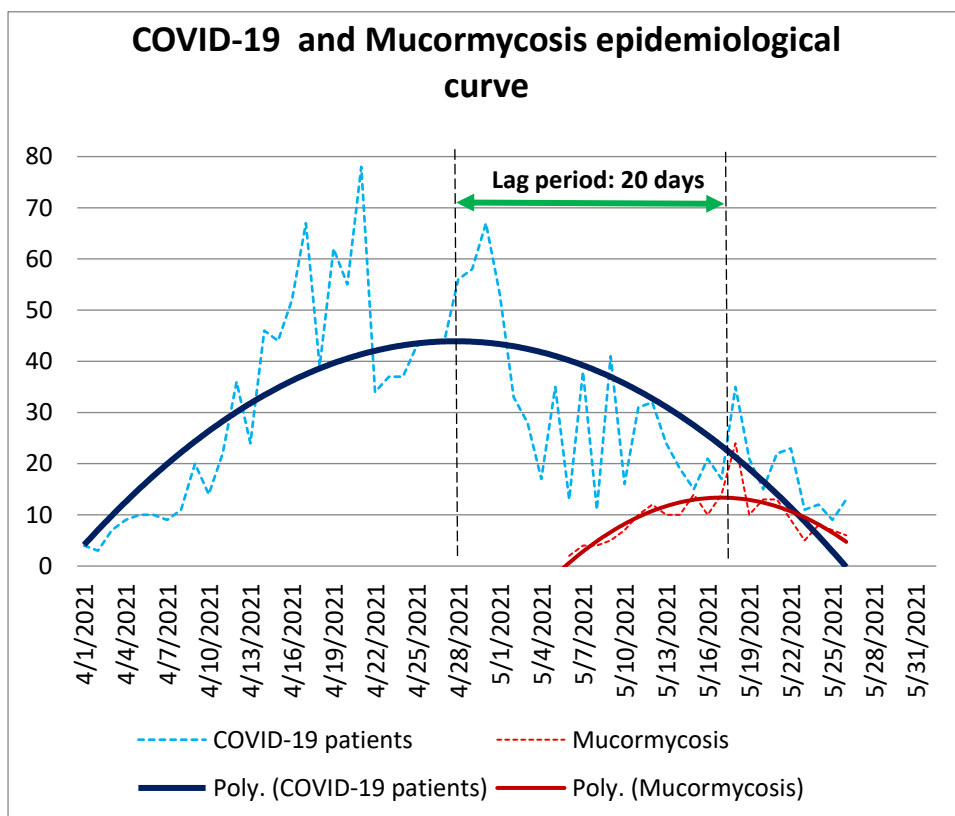

Supplement: hcab190_Supplementary_Data.pdf [file hcab190_Supplementary_Data.pdf]
